# Supplementary material for: The Impact of Surface Chemistry and Synthesis Conditions on the Adsorption of Antibiotics onto MXene Membranes
Source: MDPI journal article supplement (doi:10.3390/molecules29010148), 2023-12-26
Supplement: s1 [file s1]

## **SUPPLEMENTARY MATERIALS**

### **The Impact of Surface Chemistry and Synthesis Conditions on the Adsorption of Antibiotics onto MXene Membranes**

**Moyosore A. Afolabi <sup>1</sup>, Dequan Xiao <sup>2</sup> and Yongsheng Chen <sup>1,\*</sup>**

<sup>1</sup> School of Civil and Environmental Engineering, Georgia Institute of Technology,  
Atlanta, GA 30332, USA

<sup>2</sup> Center for Integrative Materials Discovery, Department of Chemistry and Chemical &  
Biomedical Engineering, University of New Haven, West Haven, CT 06516, USA

\* Correspondence: [yongsheng.chen@ce.gatech.edu](mailto:yongsheng.chen@ce.gatech.edu)

Number of pages: 32

Number of texts: 1

Number of figures: 7

Number of tables: 18

### **X-Ray Diffraction (XRD)**

| MXene Films                            | Bragg Angle $2\theta(^{\circ})$ |          | d-spacing ( $\text{\AA}$ ) |          | Interlayer Spacing ( $\text{\AA}$ ) |
|----------------------------------------|---------------------------------|----------|----------------------------|----------|-------------------------------------|
|                                        | Dry Film                        | Wet Film | Dry Film                   | Wet Film |                                     |
|                                        |                                 |          |                            |          |                                     |
| HF-Ti <sub>3</sub> C <sub>2</sub>      | 6.496                           | 5.244    | 13.596                     | 16.830   | 3.234                               |
| HCl/HF-Ti <sub>3</sub> C <sub>2</sub>  | 6.516                           | 5.050    | 13.554                     | 17.475   | 3.921                               |
| LiF/HCl-Ti <sub>3</sub> C <sub>2</sub> | 6.261                           | 5.556    | 14.105                     | 15.888   | 1.783                               |

**Table S1.** XRD on MXene films: Bragg angle and calculated d-spacing of (002) peak.

### X-Ray Photoelectron Spectra (XPS) Analysis

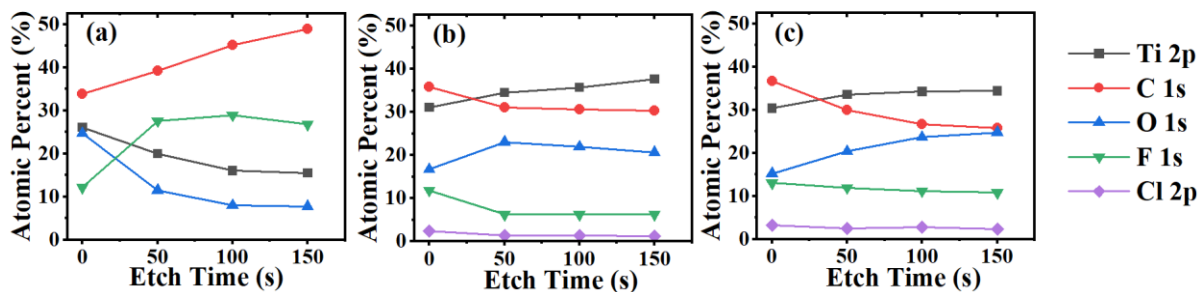

**Figure S1.** XPS depth profile ( $\text{Ar}^+$  sputtering) of MXenes. (a) HF-Ti<sub>3</sub>C<sub>2</sub>, (b) HCl/HF-Ti<sub>3</sub>C<sub>2</sub>, and (c) LiF/HCl-Ti<sub>3</sub>C<sub>2</sub>. Etch time 0 seconds = etch level 0, Etch time 50 seconds = etch level 1.

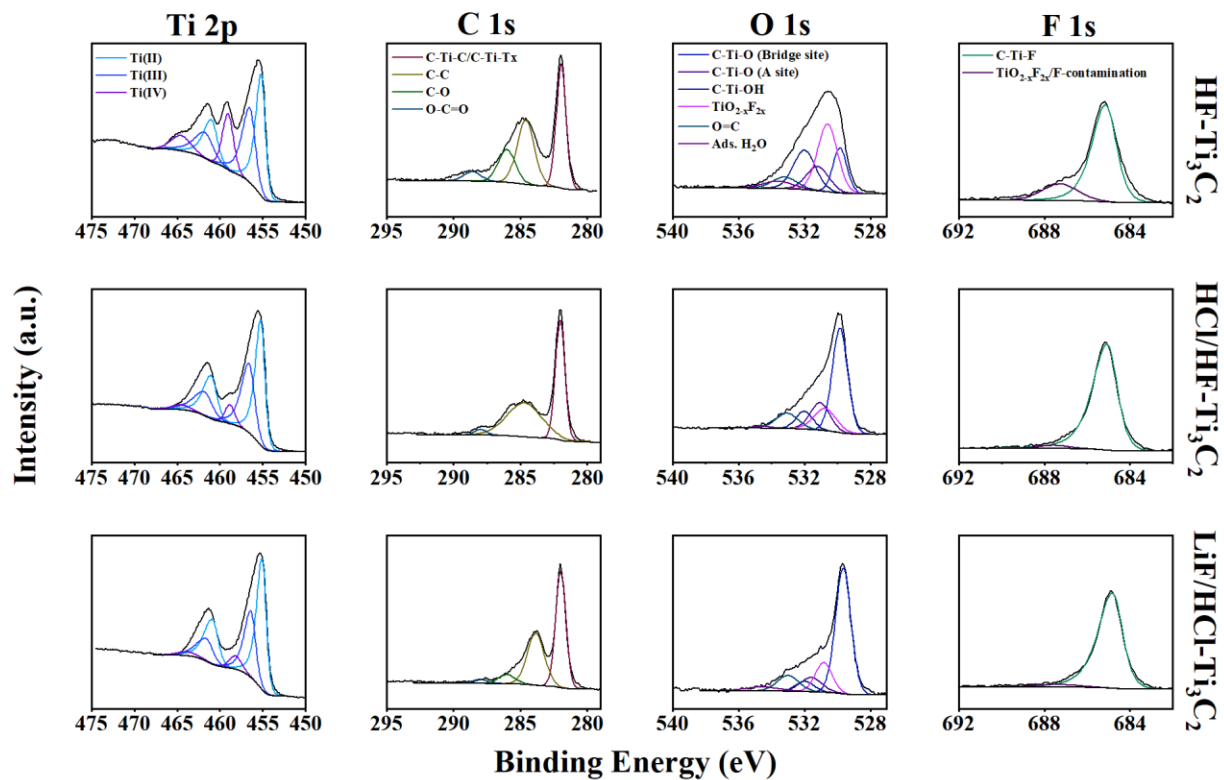

**Figure S2.** XPS peak-fit narrow scan regions with no Ar<sup>+</sup> (etch time 0 s) for (HF-Ti<sub>3</sub>C<sub>2</sub>) (a–d), (HCl/HF-Ti<sub>3</sub>C<sub>2</sub>) (e–h), and (LiF/HCl-Ti<sub>3</sub>C<sub>2</sub>) (i–l).

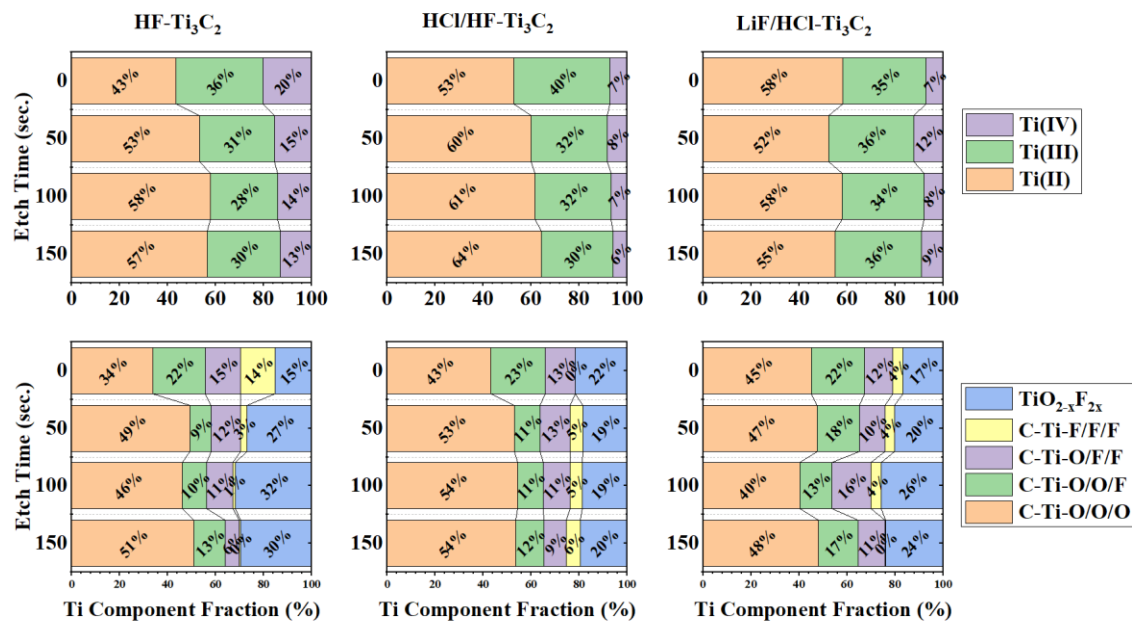

**Figure S3.** Depth profile of Ti 2p narrow scan region of MXenes. Peak fitting with Ti oxidation in the first row and peak fitting scheme by chemical environment in the bottom row.

**Table S2.** XPS peak fitting of HF-Ti<sub>3</sub>C<sub>2</sub> without Ar<sup>+</sup> sputtering/depth profiling (etch level 0, 0 s etching). MXene components are indicated under the assignment column. FWHM = full width at half maximum.

| Region                                       | BE (eV) | FWHM (eV) | At. % | Assignment                                          |
|----------------------------------------------|---------|-----------|-------|-----------------------------------------------------|
| Ti 2p <sub>3/2</sub><br>Ti 2p <sub>1/2</sub> | 455.18  | 1.1       | 11.17 | Ti <sup>2+</sup>                                    |
|                                              | 460.98  | 1.6       |       | (MXene product)                                     |
|                                              | 456.51  | 1.5       | 9.35  | Ti <sup>3+</sup>                                    |
|                                              | 461.71  | 2.2       |       | (MXene product)                                     |
|                                              | 459.07  | 1.5       | 5.27  |                                                     |
|                                              | 464.57  | 2.7       |       | Ti <sup>4+</sup>                                    |
| C 1s                                         | 281.96  | 0.9       | 15.70 | C-Ti-C/C-Ti-T <sub>x</sub><br>(MXene product)       |
|                                              | 284.60  | 1.5       | 10.84 | C-C                                                 |
|                                              | 286.02  | 1.5       | 5.57  | C-O                                                 |
|                                              | 288.60  | 1.5       | 1.64  | O-C=O                                               |
| O 1s                                         | 529.85  | 1.07      | 4.36  | C-Ti-O (bridge site)<br>(MXene product)             |
|                                              | 531.20  | 1.4       | 3.76  | C-Ti-O (A site)<br>(MXene product)                  |
|                                              | 533.20  | 1.2       | 6.04  | C-Ti-OH<br>(MXene product)                          |
|                                              | 530.60  | 1.2       | 9.25  | TiO <sub>2-x</sub> F <sub>2x</sub>                  |
|                                              | 533.20  | 3.6       | 2.02  | O=C                                                 |
|                                              | 533.60  | 2.0       | 1.54  | Ads. H <sub>2</sub> O                               |
|                                              |         |           |       |                                                     |
| F 1s                                         | 685.07  | 1.3       | 10.90 | C-Ti-F<br>(MXene product)                           |
|                                              | 687.55  | 2.0       | 2.59  | TiO <sub>2-x</sub> F <sub>2x</sub> /F-contamination |

**Table S3.** XPS peak fitting of HF-Ti<sub>3</sub>C<sub>2</sub> with Ar<sup>+</sup> sputtering/depth profiling (etch level 1, 50 s etching). MXene components are indicated under the assignment column.

| Region                                       | BE (eV) | FWHM (eV) | At. % | Assignment                                          |
|----------------------------------------------|---------|-----------|-------|-----------------------------------------------------|
| Ti 2p <sub>3/2</sub><br>Ti 2p <sub>1/2</sub> | 454.86  | 1.1       | 9.53  | Ti <sup>2+</sup>                                    |
|                                              | 460.66  | 1.6       |       | (MXene product)                                     |
|                                              | 456.50  | 1.5       | 5.63  | Ti <sup>3+</sup>                                    |
|                                              | 461.70  | 2.2       |       | (MXene product)                                     |
|                                              | 459.02  | 1.7       | 2.77  |                                                     |
|                                              | 464.72  | 3.2       |       | Ti <sup>4+</sup>                                    |
| C 1s                                         | 281.91  | 0.9       | 7.21  | C-Ti-C/C-Ti-T <sub>x</sub><br>(MXene product)       |
|                                              | 282.80  |           | 4.20  | C-Ti-O                                              |
|                                              |         | 1.4       |       | (MXene product)                                     |
|                                              | 284.60  | 1.5       | 18.27 | C-C                                                 |
|                                              | 286.10  | 1.5       | 7.57  | C-O                                                 |
|                                              | 288.20  | 1.4       | 2.14  | O-C=O                                               |
|                                              | 290.15  | 1.4       | 4.15  | C=O                                                 |
| O 1s                                         | 529.89  | 1.07      | 1.59  | C-Ti-O (bridge site)<br>(MXene product)             |
|                                              | 531.00  | 1.4       | 4.93  | C-Ti-O (A site)<br>(MXene product)                  |
|                                              | 531.93  | 1.2       | 1.58  | C-Ti-OH<br>(MXene product)                          |
|                                              | 530.61  | 1.2       | 2.12  | TiO <sub>2-x</sub> F <sub>2x</sub>                  |
|                                              | 533.22  | 3.6       | 1.17  | O=C                                                 |
|                                              | 533.72  | 2.0       | 0.17  | Ads. H <sub>2</sub> O                               |
|                                              |         |           |       |                                                     |
| F 1s                                         | 685.2   | 1.3       | 12.58 | C-Ti-F<br>(MXene product)                           |
|                                              | 686.9   | 2.0       | 17.82 | TiO <sub>2-x</sub> F <sub>2x</sub> /F-contamination |

**Table S4.** XPS peak fitting of HCl/HF-Ti<sub>3</sub>C<sub>2</sub> with Ar<sup>+</sup> sputtering/depth profiling (etch level 0, 0 s etching). MXene components are indicated under the assignment column.

| Region                                       | BE (eV) | FWHM (eV) | At. % | Assignment                                          |
|----------------------------------------------|---------|-----------|-------|-----------------------------------------------------|
| Ti 2p <sub>3/2</sub><br>Ti 2p <sub>1/2</sub> | 455.23  | 1.1       | 15.94 | Ti <sup>2+</sup>                                    |
|                                              | 461.03  | 1.6       |       | (MXene product)                                     |
|                                              | 456.60  | 1.5       | 12.01 | Ti <sup>3+</sup>                                    |
|                                              | 461.80  | 2.2       |       | (MXene product)                                     |
|                                              | 458.84  | 1.3       | 2.23  | Ti <sup>4+</sup>                                    |
|                                              | 464.54  | 2.5       |       |                                                     |
| C1s                                          | 282.03  | 0.8       | 19.69 | C-Ti-C/C-Ti-T <sub>x</sub>                          |
|                                              |         |           |       | (MXene product)                                     |
|                                              | 284.71  | 3.06      | 20.57 | C-C                                                 |
|                                              | 287.98  | 1.1       | 1.19  | C=O                                                 |
| O1s                                          | 529.84  | 1.0       | 5.93  | C-Ti-O (bridge site)                                |
|                                              |         |           |       | (MXene product)                                     |
|                                              | 531.06  | 1.6       | 2.02  | C-Ti-O (A site)                                     |
|                                              |         |           |       | (MXene product)                                     |
|                                              | 532.00  | 1.6       | 1.13  | C-Ti-OH                                             |
|                                              |         |           |       | (MXene product)                                     |
|                                              | 530.75  | 1.6       | 1.86  | TiO <sub>2-x</sub> F <sub>2x</sub>                  |
|                                              | 533.06  | 1.5       | 1.29  | O=C                                                 |
|                                              | 534.60  | 1.9       | 0.13  | Ads. H <sub>2</sub> O                               |
| F 1s                                         | 685.07  | 1.2       | 13.24 | C-Ti-F                                              |
|                                              |         |           |       | (MXene product)                                     |
|                                              | 6867.55 | 1.7       | 0.44  | TiO <sub>2-x</sub> F <sub>2x</sub> /F-contamination |
| Cl 2p                                        | 200.08  | -         | 2.31  | C-Ti-Cl                                             |
|                                              |         |           |       | (MXene product)                                     |

**Table S5.** XPS peak fitting of HCl/HF-Ti<sub>3</sub>C<sub>2</sub> with Ar<sup>+</sup> sputtering/depth profiling (etch level 1, 50 s etching). MXene components are indicated under the assignment column.

| Region                                       | BE (eV) | FWHM (eV) | At. % | Assignment                                          |
|----------------------------------------------|---------|-----------|-------|-----------------------------------------------------|
| Ti 2p <sub>3/2</sub><br>Ti 2p <sub>1/2</sub> | 454.89  | 1.1       | 20.44 | Ti <sup>2+</sup>                                    |
|                                              | 460.69  | 1.6       |       | (MXene product)                                     |
|                                              | 456.69  | 1.5       | 10.92 | Ti <sup>3+</sup>                                    |
|                                              | 461.70  | 2.2       |       | (MXene product)                                     |
|                                              | 458.50  | 1.6       | 2.82  | Ti <sup>4+</sup>                                    |
|                                              | 464.20  | 3.0       |       |                                                     |
| C 1s                                         | 281.94  | 0.8       | 9.24  | C-Ti-C/C-Ti-T <sub>x</sub><br>(MXene product)       |
|                                              | 282.42  | 2.0       | 10.47 | C-Ti-O<br>(MXene product)                           |
|                                              | 284.28  | 1.5       | 3.48  | C-C                                                 |
|                                              | 286.29  | 2.7       | 10.11 | C-O                                                 |
|                                              | 289.08  | 1.1       | 0.93  | C=O                                                 |
| O 1s                                         | 529.5   | 1.0       | 0.38  | C-Ti-O (bridge site)<br>(MXene product)             |
|                                              | 531.01  | 1.6       | 12.02 | C-Ti-O (A site)<br>(MXene product)                  |
|                                              | 532.00  | 1.6       | 3.17  | C-Ti-OH<br>(MXene product)                          |
|                                              | 530.20  | 1.6       | 6.21  | TiO <sub>2-x</sub> F <sub>2x</sub>                  |
|                                              | 533.00  | 1.5       | 2.28  | O=C                                                 |
|                                              | 534.60  | 1.9       | 0.88  | Ads. H <sub>2</sub> O                               |
|                                              |         |           |       |                                                     |
| F 1s                                         | 684.99  | 1.2       | 4.66  | C-Ti-F<br>(MXene product)                           |
|                                              | 686.80  | 1.7       | 1.16  | TiO <sub>2-x</sub> F <sub>2x</sub> /F-contamination |



|       |        |   |      |                            |
|-------|--------|---|------|----------------------------|
| Cl 2p | 199.91 | - | 0.79 | C-Ti-Cl<br>(MXene product) |
|-------|--------|---|------|----------------------------|

**Table S6.** XPS peak fitting of LiF/HCl-Ti<sub>3</sub>C<sub>2</sub> with Ar<sup>+</sup> sputtering/depth profiling (etch level 0, 0 s etching). MXene components are indicated under the assignment column.

| Region                                       | BE (eV) | FWHM (eV) | At. % | Assignment                                              |
|----------------------------------------------|---------|-----------|-------|---------------------------------------------------------|
| Ti 2p <sub>3/2</sub><br>Ti 2p <sub>1/2</sub> | 455.08  | 1.1       | 15.91 | Ti <sup>2+</sup>                                        |
|                                              | 460.88  | 1.6       |       | (MXene product)                                         |
|                                              | 456.40  | 1.3       | 9.50  | Ti <sup>3+</sup>                                        |
|                                              | 461.60  | 1.9       |       | (MXene product)                                         |
|                                              | 458.20  | 1.7       | 1.92  | Ti <sup>4+</sup>                                        |
|                                              | 463.80  | 3.0       |       |                                                         |
| Cl 1s                                        | 282.99  | 0.9       | 22.82 | C-Ti-C/C-Ti-T <sub>x</sub><br>(MXene product)           |
|                                              | 283.85  | 1.5       | 15.97 | C-C                                                     |
|                                              | 284.88  | 1.5       | 3.73  | C-O                                                     |
|                                              | 286.01  | 1.37      | 1.16  | C=O                                                     |
| O 1s                                         | 529.65  | 1.0       | 7.68  | C-Ti-O (bridge site)<br>(MXene product)                 |
|                                              | 531.60  | 1.6       | 1.13  | C-Ti-O (A site)<br>(MXene product)                      |
|                                              | 531.95  | 1.6       | 0.69  | C-Ti-OH<br>(MXene product)                              |
|                                              | 530.84  | 1.6       | 2.00  | TiO <sub>2-x</sub> F <sub>2x</sub>                      |
|                                              | 533.00  | 1.5       | 1.42  | O=C                                                     |
|                                              | 534.55  | 1.9       | 0.19  | Ads. H <sub>2</sub> O                                   |
|                                              |         |           |       |                                                         |
| F 1s                                         | 684.82  | 1.2       | 12.05 | C-Ti-F<br>(MXene product)                               |
|                                              | 687.40  | 1.7       | 0.56  | TiO <sub>2-x</sub> F <sub>2x</sub> /F-<br>contamination |
| Cl 2p                                        | 200.51  |           | 3.13  | C-Ti-Cl<br>(MXene product)                              |

**Table S7.** XPS peak fitting of LiF/HCl-Ti<sub>3</sub>C<sub>2</sub> with Ar<sup>+</sup> sputtering/depth profiling (etch level 1, 50 s etching). MXene components are indicated under the assignment column.

| Region                                       | BE (eV) | FWHM (eV) | At. % | Assignment                                          |
|----------------------------------------------|---------|-----------|-------|-----------------------------------------------------|
| Ti 2p <sub>3/2</sub><br>Ti 2p <sub>1/2</sub> | 454.77  | 1.1       | 18.08 | Ti <sup>2+</sup>                                    |
|                                              | 460.47  | 1.6       |       | (MXene product)                                     |
|                                              | 456.13  | 1.5       | 12.30 | Ti <sup>3+</sup>                                    |
|                                              | 461.33  | 2.2       |       | (MXene product)                                     |
|                                              | 458.03  | 1.7       | 4.19  | Ti <sup>4+</sup>                                    |
|                                              | 463.72  | 3.0       |       |                                                     |
| C1s                                          | 281.94  | 0.8       | 8.94  | C-Ti-C/C-Ti-T <sub>x</sub><br>(MXene product)       |
|                                              | 282.51  | 2.0       | 12.86 | C-Ti-O<br>(MXene product)                           |
|                                              | 284.57  | 1.5       | 6.22  | C-C                                                 |
|                                              | 286.49  | 1.5       | 2.37  | C-O                                                 |
|                                              | 288.5   | 2.1       | 1.21  | O-C=O                                               |
| O1s                                          | 529.74  | 1.0       | 2.92  | C-Ti-O (bridge site)<br>(MXene product)             |
|                                              | 531.20  | 1.6       | 4.63  | C-Ti-O (A site)<br>(MXene product)                  |
|                                              | 532.00  | 1.6       | 2.17  | C-Ti-OH<br>(MXene product)                          |
|                                              | 530.51  | 1.6       | 6.22  | TiO <sub>2-x</sub> F <sub>2x</sub>                  |
|                                              | 533.00  | 1.5       | 1.57  | O=C                                                 |
|                                              | 534.60  | 1.9       | 0.88  | Ads. H <sub>2</sub> O                               |
|                                              |         |           |       |                                                     |
| F 1s                                         | 684.88  | 1.2       | 10.11 | C-Ti-F<br>(MXene product)                           |
|                                              | 686.80  | 1.7       | 1.20  | TiO <sub>2-x</sub> F <sub>2x</sub> /F-contamination |

|       |        |  |      |                            |
|-------|--------|--|------|----------------------------|
| Cl 2p | 200.52 |  | 3.16 | C-Ti-Cl<br>(MXene product) |
|-------|--------|--|------|----------------------------|

**Table S8.** XPS peak fitting of MXenes. Values are an average of the peak fitted values over the 4-layer depth profile.

|                                        | Region                                       | BE (eV) | FWHM (eV) | Fraction | Assignment                         |
|----------------------------------------|----------------------------------------------|---------|-----------|----------|------------------------------------|
| HF-Ti <sub>3</sub> C <sub>2</sub>      | Ti 2p <sub>3/2</sub><br>Ti 2p <sub>1/2</sub> | 455.0   | 1.3       | 0.45     | C-Ti-O/O/O                         |
|                                        |                                              | 461.1   | 1.5       |          | (MXene product)                    |
|                                        |                                              | 456.4   | 1.3       | 0.14     | C-Ti-O/O/F                         |
|                                        |                                              | 462.5   | 1.5       |          | (MXene product)                    |
|                                        |                                              | 457.1   | 1.3       | 0.11     | C-Ti-O/F/F                         |
|                                        |                                              | 463.2   | 1.5       |          | (MXene product)                    |
|                                        |                                              | 459.4   | 1.3       | 0.05     | C-Ti-F/F/F                         |
|                                        |                                              | 465.1   | 1.5       |          | (MXene product)                    |
|                                        |                                              | 459.4   | 2.4       | 0.26     | TiO <sub>2-x</sub> F <sub>2x</sub> |
|                                        |                                              | 465.1   | 3.2       |          |                                    |
| HCl/HF-Ti <sub>3</sub> C <sub>2</sub>  | Ti 2p <sub>3/2</sub><br>Ti 2p <sub>1/2</sub> | 455.0   | 1.3       | 0.51     | C-Ti-O/O/O                         |
|                                        |                                              | 461.1   | 1.6       |          | (MXene product)                    |
|                                        |                                              | 456.3   | 1.3       | 0.14     | C-Ti-O/O/F                         |
|                                        |                                              | 462.4   | 1.6       |          | (MXene product)                    |
|                                        |                                              | 457.0   | 1.3       | 0.12     | C-Ti-O/F/F                         |
|                                        |                                              | 463.1   | 1.6       |          | (MXene product)                    |
|                                        |                                              | 457.9   | 1.3       | 0.04     | C-Ti-F/F/F                         |
|                                        |                                              | 464.0   | 1.6       |          | (MXene product)                    |
|                                        |                                              | 459.5   | 2.3       | 0.20     | TiO <sub>2-x</sub> F <sub>2x</sub> |
|                                        |                                              | 465.1   | 3.3       |          |                                    |
| LiF/HCl-Ti <sub>3</sub> C <sub>2</sub> | Ti 2p <sub>3/2</sub><br>Ti 2p <sub>1/2</sub> | 455.1   | 1.3       | 0.45     | C-Ti-O/O/O                         |
|                                        |                                              | 461.1   | 1.4       |          | (MXene product)                    |
|                                        |                                              | 456.1   | 1.3       | 0.17     | C-Ti-O/O/F                         |
|                                        |                                              | 462.2   | 1.4       |          | (MXene product)                    |
|                                        |                                              | 457.1   | 1.3       | 0.13     | C-Ti-O/F/F                         |
|                                        |                                              | 463.2   | 1.4       |          | (MXene product)                    |

|       |     |      |                                    |
|-------|-----|------|------------------------------------|
| 457.9 | 1.3 | 0.02 | C-Ti-F/F/F                         |
| 464.0 | 1.4 |      | (MXene product)                    |
| 459.4 | 2.6 | 0.22 | TiO <sub>2-x</sub> F <sub>2x</sub> |
| 465.0 | 3.3 |      |                                    |

---

## Zeta Potential Analysis

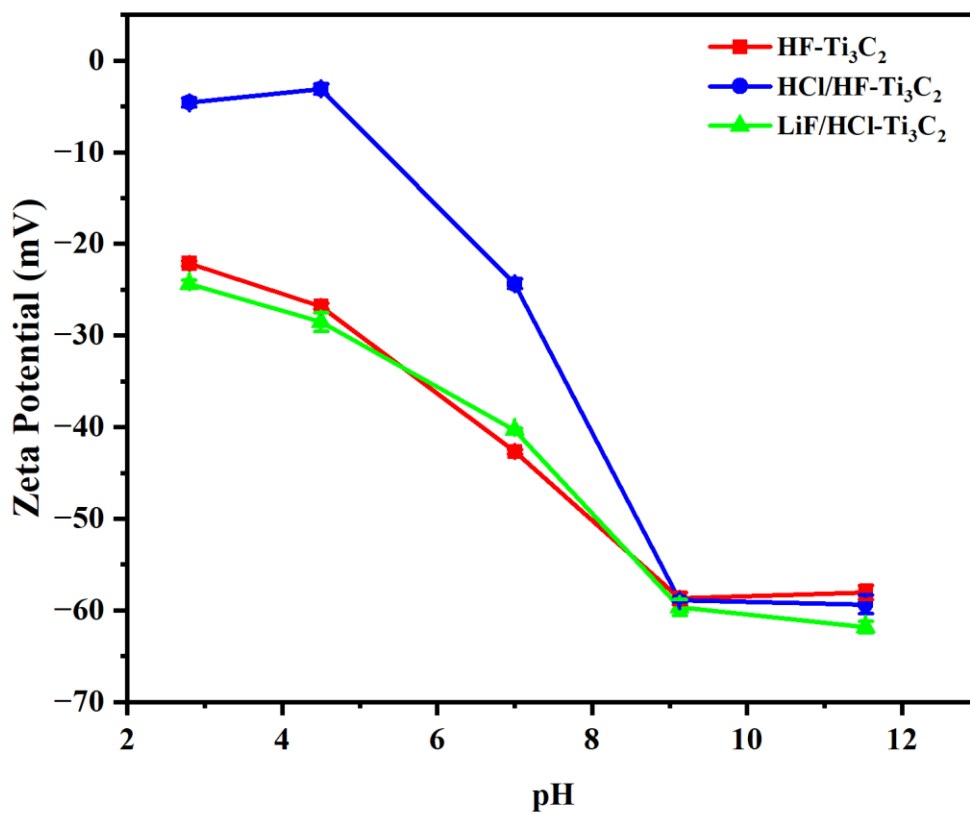

**Figure S4.** Zeta potential of MXene suspension at pH 2.8 to pH 11.5.

**Table S9.** Distribution coefficients of ionizable antibiotics at different pH. Data sourced from ChemAxon's Chemcalize<sup>1</sup>.

| Antibiotic | Log D at<br>pH 2.8 | Log D at<br>pH 7 | Log D at<br>pH 11.5 |
|------------|--------------------|------------------|---------------------|
| SMX        | 0.73               | 0.03             | -0.15               |
| TMP        | -0.19              | 0.92             | 1.28                |
| NOR        | -1.80              | -0.87            | -2.07               |
| LEV        | -1.93              | -0.80            | -1.97               |



## Text S1. Adsorption Experimental Data, Regression, and Statistical Analysis

All regression (linear and nonlinear) analysis was conducted in OriginPro, Version 2023b (OriginLab Corporation). All nonlinear curve fitting was conducted with the Levenberg–Marquardt minimization algorithm (damped least-squares), with iterations conducted to a tolerance of  $\chi^2 = 1\text{E-}9^2$ . The nonlinear and linear isotherm equations are displayed below.

|                          |                                        |                                                                                                    |
|--------------------------|----------------------------------------|----------------------------------------------------------------------------------------------------|
| Freundlich               | $q_e = K_F C_e^{1/n}$                  | $\frac{1}{q_e} = \left(\frac{1}{K_L q_m}\right) \frac{1}{C_e} + \frac{1}{q_m}$                     |
| Langmuir                 | $\frac{K_L q_m C_e}{1 + K_L C_e}$      | $\frac{1}{q_e} = \left(\frac{1}{K_L q_m}\right) \frac{1}{C_e} + \frac{1}{q_m}$                     |
| Dubinin–<br>Radushkevich | $q_e = q_m \exp(-\beta \varepsilon^2)$ | $\ln q_e = \ln q_m - \beta \varepsilon^2$<br>$\varepsilon = RT \ln \left(1 + \frac{1}{C_e}\right)$ |

Statistical error parameters of the coefficient of determination ( $R^2$ ). The adjusted  $R^2$ , reduced chi-square (Red.  $\chi^2$ ), sum of squared error or residual sum of squares (SSE or RSS), and the root mean square error (RMSE) were calculated within the OriginPro software and used to assess the ‘goodness-of-fit’ of each of the isotherm models for the antibiotic adsorption experiments.

The Dubinin–Radushkevich and Freundlich isotherm details are outlined within the main manuscript in the Materials and Methods section. Langmuir is an appropriate fit for antibiotic adsorption (regardless of linear or nonlinear fitting), however, details of the isotherm are described below.

### Additional isotherm fitting: Langmuir isotherm

The Langmuir sorption isotherm model assumes monolayer adsorption on a homogenous surface with equally available and energetic sites. The equation is as follows:

Langmuir:  $q_e = \frac{q_m K_L C_e}{1 + K_L C_e}$

where  $K_L$  (L/mg) is the Langmuir constant and  $q_m$  (mg/g) is the maximum adsorption capacity. The separation factor,  $R_L$ , is a dimensionless number that describes the favorability of the adsorption process, and the equation is as follows,

$$R_L = \frac{1}{1 + K_L C_0}$$

where  $C_0$  (mg/L) is the initial concentration of adsorbate.  $0 < R_L < 1$  denotes favorable adsorption, while  $R_L > 1$  denotes unfavorable adsorption,  $R_L = 0$  indicates irreversible adsorption and  $R_L = 1$  indicates that the adsorption isotherm follows a linear profile.

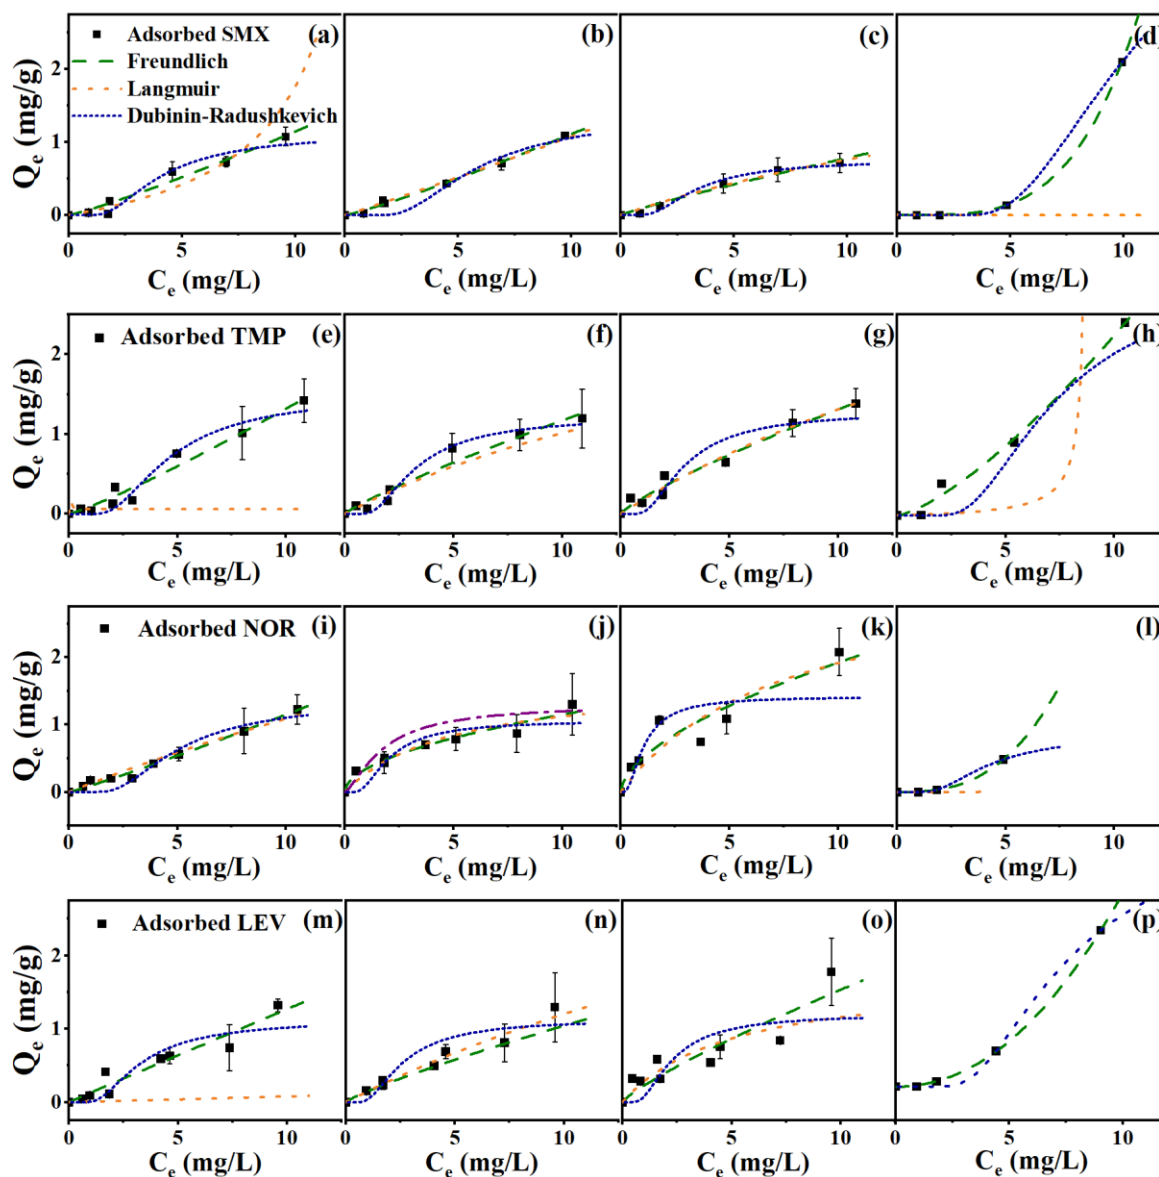

**Figure S5.** Adsorption isotherm experimental data with the Freundlich (green), Langmuir (orange), and Dubinin–Radushkevich (blue) nonlinear fits for SMX, TMP, NOR, and LEV. Adsorption of antibiotic on HF-Ti3C2 (a,c,i,m), HCl/HF-Ti3C2 (b,f,j,n), LiF/HCl-Ti3C2 (c,g,k,o), and PVDF (d,h,l,p).

**Table S10.** Summary of the Freundlich adsorption isotherm fitting parameters and statistical error analysis from nonlinear regression.

|                                            |     | Freundlich<br>Nonlinear Fitting        |       |       |                |                     |               |       |
|--------------------------------------------|-----|----------------------------------------|-------|-------|----------------|---------------------|---------------|-------|
|                                            |     | $K_F$<br>[(mg/g)/(mg/L) <sup>n</sup> ] | n     | SSE   | R <sup>2</sup> | Adj. R <sup>2</sup> | Red. $\chi^2$ | RMSE  |
| HF-<br>Ti <sub>3</sub> C <sub>2</sub>      | SMX | 0.084                                  | 0.880 | 0.039 | 0.964          | 0.957               | 0.008         | 0.088 |
|                                            | TMP | 0.095                                  | 0.874 | 0.074 | 0.964          | 0.959               | 0.011         | 0.103 |
|                                            | NOR | 0.093                                  | 0.915 | 0.017 | 0.987          | 0.986               | 0.002         | 0.049 |
|                                            | LEV | 0.130                                  | 1.011 | 0.111 | 0.926          | 0.916               | 0.016         | 0.126 |
| HCl/HF-<br>Ti <sub>3</sub> C <sub>2</sub>  | SMX | 0.081                                  | 0.878 | 0.006 | 0.994          | 0.993               | 0.001         | 0.034 |
|                                            | TMP | 0.161                                  | 1.159 | 0.066 | 0.958          | 0.951               | 0.011         | 0.105 |
|                                            | NOR | 0.346                                  | 1.920 | 0.046 | 0.958          | 0.950               | 0.008         | 0.088 |
|                                            | LEV | 0.147                                  | 1.069 | 0.035 | 0.972          | 0.968               | 0.006         | 0.076 |
| LiF/HCl-<br>Ti <sub>3</sub> C <sub>2</sub> | SMX | 0.100                                  | 1.121 | 0.012 | 0.975          | 0.968               | 0.003         | 0.055 |
|                                            | TMP | 0.197                                  | 1.216 | 0.047 | 0.973          | 0.968               | 0.008         | 0.089 |
|                                            | NOR | 0.498                                  | 1.707 | 0.296 | 0.891          | 0.869               | 0.059         | 0.243 |
|                                            | LEV | 0.228                                  | 1.209 | 0.350 | 0.832          | 0.808               | 0.050         | 0.224 |
| PVDF                                       | SMX | 0.000                                  | 0.263 | 0.000 | 0.999          | 1.000               | 0.000         | 0.002 |
|                                            | TMP | 0.103                                  | 0.726 | 0.040 | 0.992          | 0.989               | 0.013         | 0.116 |
|                                            | NOR | 0.006                                  | 0.359 | 0.000 | 1.000          | 1.000               | 0.000         | 0.004 |
|                                            | LEV | 0.023                                  | 0.478 | 0.000 | 0.999          | 1.000               | 0.000         | 0.012 |

**Table S11.** Summary of the Freundlich adsorption isotherm fitting parameters and statistical error analysis from linear regression.

|                                        |     | Freundlich<br>Linear Fitting           |       |       |                |                     |               |       |
|----------------------------------------|-----|----------------------------------------|-------|-------|----------------|---------------------|---------------|-------|
|                                        |     | $K_F$<br>[(mg/g)/(mg/L) <sup>n</sup> ] | n     | SSE   | R <sup>2</sup> | Adj. R <sup>2</sup> | Red. $\chi^2$ | RMSE  |
| HF-Ti <sub>3</sub> C <sub>2</sub>      | SMX | 0.030                                  | 0.606 | 0.669 | 0.768          | 0.710               | 0.167         | 0.409 |
|                                        | TMP | 0.072                                  | 0.803 | 0.319 | 0.866          | 0.843               | 0.053         | 0.230 |
|                                        | NOR | 0.153                                  | 1.203 | 0.299 | 0.748          | 0.712               | 0.043         | 0.207 |
|                                        | LEV | 0.082                                  | 0.897 | 0.860 | 0.646          | 0.595               | 0.123         | 0.350 |
| HCl/HF-Ti <sub>3</sub> C <sub>2</sub>  | SMX | 0.058                                  | 0.742 | 0.134 | 0.920          | 0.900               | 0.034         | 0.183 |
|                                        | TMP | 0.119                                  | 1.004 | 0.183 | 0.883          | 0.860               | 0.037         | 0.191 |
|                                        | NOR | 0.315                                  | 1.906 | 0.107 | 0.786          | 0.756               | 0.015         | 0.124 |
|                                        | LEV | 0.163                                  | 1.148 | 0.016 | 0.976          | 0.971               | 0.003         | 0.056 |
| LiF/HCl-Ti <sub>3</sub> C <sub>2</sub> | SMX | 0.045                                  | 0.748 | 0.056 | 0.961          | 0.947               | 0.019         | 0.137 |
|                                        | TMP | 0.222                                  | 1.380 | 0.129 | 0.855          | 0.826               | 0.026         | 0.161 |
|                                        | NOR | 0.494                                  | 2.365 | 0.196 | 0.585          | 0.526               | 0.028         | 0.167 |
|                                        | LEV | 0.364                                  | 2.009 | 0.123 | 0.754          | 0.714               | 0.021         | 0.143 |
| PVDF                                   | SMX | 0.000                                  | 0.149 | 0.016 | 0.999          | 0.997               | 0.016         | 0.126 |
|                                        | TMP | 0.015                                  | 0.411 | 0.833 | 0.799          | 0.699               | 0.416         | 0.645 |
|                                        | NOR | 0.000                                  | 0.220 | 1.602 | 0.886          | 0.829               | 0.801         | 0.895 |
|                                        | LEV | 0.002                                  | 0.279 | 0.906 | 0.889          | 0.833               | 0.453         | 0.673 |

**Table S12.** Summary of the Langmuir adsorption isotherm fitting parameters and statistical error analysis from nonlinear regression.

Blank spaces indicate adsorption isotherms that could not be derived by nonlinear curve fitting.

|                                            |     | Langmuir<br>Nonlinear fitting |                |                |       |         |                |                        |               |         |
|--------------------------------------------|-----|-------------------------------|----------------|----------------|-------|---------|----------------|------------------------|---------------|---------|
|                                            |     | Q <sub>m</sub>                | K <sub>L</sub> | R <sub>L</sub> |       | SSE     | R <sup>2</sup> | Adj.<br>R <sup>2</sup> | Red. $\chi^2$ | RMSE    |
| HF-<br>Ti <sub>3</sub> C <sub>2</sub>      | SMX |                               |                |                |       |         |                |                        |               |         |
|                                            | TMP |                               |                |                |       |         |                |                        |               |         |
|                                            | NOR |                               |                |                |       |         |                |                        |               |         |
|                                            | LEV |                               |                |                |       |         |                |                        |               |         |
| HCl/HF-<br>Ti <sub>3</sub> C <sub>2</sub>  | SMX |                               |                |                |       |         |                |                        |               |         |
|                                            | TMP | 3.94337                       | 0.0416         | 0.706          | 0.980 | 0.05327 | 0.96605        | 0.96039                | 0.00888       | 0.09422 |
|                                            | NOR | 1.68447                       | 0.19865        | 0.335          | 0.910 | 0.08617 | 0.92066        | 0.90743                | 0.01436       | 0.11984 |
|                                            | LEV | 24.47871                      | 0.00552        | 0.948          | 0.997 | 0.03665 | 0.97067        | 0.96578                | 0.00611       | 0.07815 |
| LiF/HCl-<br>Ti <sub>3</sub> C <sub>2</sub> | SMX | 2.78432                       | 0.03764        | 0.727          | 0.982 | 0.00893 | 0.98147        | 0.97684                | 0.00223       | 0.04726 |
|                                            | TMP | 4.93051                       | 0.03617        | 0.734          | 0.982 | 0.05144 | 0.97046        | 0.96554                | 0.00857       | 0.09259 |
|                                            | NOR | 3.43076                       | 0.12571        | 0.443          | 0.941 | 0.43201 | 0.84078        | 0.80894                | 0.0864        | 0.29394 |
|                                            | LEV |                               |                |                |       |         |                |                        |               |         |
| PVDF                                       | SMX |                               |                |                |       |         |                |                        |               |         |
|                                            | TMP |                               |                |                |       |         |                |                        |               |         |
|                                            | NOR |                               |                |                |       |         |                |                        |               |         |
|                                            | LEV |                               |                |                |       |         |                |                        |               |         |

**Table S13.** Summary of the Langmuir adsorption isotherm fitting parameters and statistical error analysis from linear regression.

|                       |     | Langmuir<br>Linear Fitting |       |       |       |          |       |            |               |          |
|-----------------------|-----|----------------------------|-------|-------|-------|----------|-------|------------|---------------|----------|
|                       |     | $Q_m$                      | $K_L$ | $R_L$ |       | SSE      | $R^2$ | Adj. $R^2$ | Red. $\chi^2$ | RMSE     |
| HF-<br>$Ti_3C_2$      | SMX | 0.953                      | 0.030 | 0.769 | 0.985 | 2.24E+03 | 0.299 | 0.124      | 561.166       | 23.689   |
|                       | TMP | 0.833                      | 0.100 | 0.501 | 0.953 | 282.939  | 0.542 | 0.466      | 47.157        | 6.867    |
|                       | NOR | 2.675                      | 0.054 | 0.648 | 0.974 | 17.393   | 0.826 | 0.801      | 2.485         | 1.576    |
|                       | LEV | 0.790                      | 0.105 | 0.488 | 0.950 | 265.628  | 0.516 | 0.447      | 37.947        | 6.160    |
| HCl/HF-<br>$Ti_3C_2$  | SMX | 0.162                      | 0.192 | 1.08  | 25.7  | 158.703  | 0.847 | 0.809      | 39.676        | 6.299    |
|                       | TMP | 0.612                      | 0.266 | 0.273 | 0.882 | 84.980   | 0.536 | 0.443      | 16.996        | 4.123    |
|                       | NOR | 0.748                      | 0.891 | 0.101 | 0.692 | 7.522    | 0.460 | 0.382      | 1.075         | 1.037    |
|                       | LEV | 2.734                      | 0.063 | 0.613 | 0.969 | 0.621    | 0.975 | 0.970      | 0.124         | 0.352    |
| LiF/HCl-<br>$Ti_3C_2$ | SMX | 0.223                      | 0.138 | 2.65  | 3.21  | 55.679   | 0.939 | 0.919      | 18.560        | 4.308    |
|                       | TMP | 0.646                      | 0.653 | 0.133 | 0.754 | 19.055   | 0.490 | 0.388      | 3.811         | 1.952    |
|                       | NOR | 0.980                      | 1.197 | 0.077 | 0.626 | 2.114    | 0.544 | 0.478      | 0.302         | 0.550    |
|                       | LEV | 0.753                      | 1.258 | 0.074 | 0.613 | 3.647    | 0.541 | 0.464      | 0.608         | 0.780    |
| PVDF                  | SMX | 0.000                      | 0.332 | 1.51  | 1.20  | 4.21E+10 | 0.891 | 0.781      | 4.21E+10      | 2.05E+05 |
|                       | TMP | 0.022                      | 0.207 | 28.9  | 1.12  | 4.68E+03 | 0.794 | 0.691      | 2.34E+03      | 48.376   |
|                       | NOR | 0.000                      | 0.233 | 6.10  | 1.13  | 9.94E+07 | 0.789 | 0.684      | 4.97E+07      | 7.05E+03 |
|                       | LEV | 0.001                      | 0.250 | 3.97  | 1.14  | 9.02E+05 | 0.818 | 0.728      | 4.51E+05      | 671.680  |

**Table S14.** Summary of the Dubinin–Radushkevich adsorption isotherm fitting parameters and statistical error analysis from nonlinear regression.

|                                            |     | Dubinin-Radushkevich |         |                 |       |       |            |               |       |
|--------------------------------------------|-----|----------------------|---------|-----------------|-------|-------|------------|---------------|-------|
|                                            |     | Nonlinear fitting    |         |                 |       |       |            |               |       |
|                                            |     | $Q_m$<br>[mg/g]      | $\beta$ | $E$<br>[kJ/mol] | SSE   | $R^2$ | Adj. $R^2$ | Red. $\chi^2$ | RMSE  |
| HF-<br>Ti <sub>3</sub> C <sub>2</sub>      | SMX | 1.125                | 2.578   | 0.440           | 0.047 | 0.956 | 0.947      | 0.010         | 0.097 |
|                                            | TMP | 1.510                | 3.311   | 0.389           | 0.118 | 0.943 | 0.935      | 0.027         | 0.130 |
|                                            | NOR | 1.365                | 3.918   | 0.357           | 0.093 | 0.930 | 0.920      | 0.013         | 0.115 |
|                                            | LEV | 1.121                | 1.769   | 0.532           | 0.265 | 0.824 | 0.798      | 0.038         | 0.195 |
| HCl/HF-<br>Ti <sub>3</sub> C <sub>2</sub>  | SMX | 1.406                | 5.179   | 0.311           | 0.078 | 0.919 | 0.903      | 0.016         | 0.125 |
|                                            | TMP | 1.217                | 1.747   | 0.535           | 0.030 | 0.981 | 0.977      | 0.005         | 0.071 |
|                                            | NOR | 1.058                | 0.776   | 0.802           | 0.225 | 0.793 | 0.758      | 0.038         | 0.194 |
|                                            | LEV | 1.131                | 1.716   | 0.540           | 0.200 | 0.840 | 0.813      | 0.033         | 0.183 |
| LiF/HCl-<br>Ti <sub>3</sub> C <sub>2</sub> | SMX | 0.760                | 1.869   | 0.517           | 0.007 | 0.985 | 0.981      | 0.002         | 0.043 |
|                                            | TMP | 1.281                | 1.454   | 0.586           | 0.205 | 0.882 | 0.863      | 0.034         | 0.185 |
|                                            | NOR | 1.412                | 0.278   | 1.341           | 0.866 | 0.681 | 0.617      | 0.173         | 0.416 |
|                                            | LEV | 1.199                | 0.924   | 0.736           | 0.897 | 0.570 | 0.509      | 0.128         | 0.358 |
| PVDF                                       | SMX | 5.503                | 17.429  | 0.169           | 0.000 | 1.000 | 1.000      | 0.000         | 0.000 |
|                                            | TMP | 3.894                | 7.776   | 0.254           | 0.186 | 0.961 | 0.949      | 0.062         | 0.249 |
|                                            | NOR | 0.877                | 2.883   | 0.416           | 0.000 | 1.000 | 1.000      | 0.000         | 0.000 |
|                                            | LEV | 3.951                | 8.063   | 0.249           | 0.006 | 0.999 | 0.998      | 0.002         | 0.043 |



**Table S15.** Summary of the Dubinin–Radushkevich isotherm adsorption fitting parameters and statistical analysis from linear regression.

|                                        |     | Dubinin-Radushkevich |         |               |       |       |            |               |       |
|----------------------------------------|-----|----------------------|---------|---------------|-------|-------|------------|---------------|-------|
|                                        |     | Linear fitting       |         |               |       |       |            |               |       |
|                                        |     | $Q_m$<br>[mg/g]      | $\beta$ | E<br>[kJ/mol] | SSE   | $R^2$ | Adj. $R^2$ | Red. $\chi^2$ | RMSE  |
| HF-Ti <sub>3</sub> C <sub>2</sub>      | SMX | 0.545                | 0.993   | 0.710         | 6.653 | 0.565 | 0.456      | 1.663         | 1.290 |
|                                        | TMP | 0.487                | 0.441   | 1.064         | 6.139 | 0.512 | 0.431      | 1.023         | 1.012 |
|                                        | NOR | 0.614                | 0.415   | 1.098         | 2.355 | 0.625 | 0.571      | 0.336         | 0.580 |
|                                        | LEV | 0.477                | 0.483   | 1.017         | 6.726 | 0.477 | 0.403      | 0.961         | 0.980 |
| HCl/HF-Ti <sub>3</sub> C <sub>2</sub>  | SMX | 0.723                | 0.929   | 0.734         | 0.460 | 0.948 | 0.935      | 0.115         | 0.339 |
|                                        | TMP | 0.561                | 0.334   | 1.224         | 4.011 | 0.516 | 0.419      | 0.802         | 0.896 |
|                                        | NOR | 0.677                | 0.162   | 1.757         | 1.563 | 0.414 | 0.330      | 0.223         | 0.473 |
|                                        | LEV | 0.779                | 0.591   | 0.920         | 0.707 | 0.793 | 0.751      | 0.141         | 0.376 |
| LiF/HCl-Ti <sub>3</sub> C <sub>2</sub> | SMX | 0.589                | 0.882   | 0.753         | 0.307 | 0.959 | 0.946      | 0.102         | 0.320 |
|                                        | TMP | 0.650                | 0.205   | 1.562         | 2.654 | 0.441 | 0.329      | 0.531         | 0.729 |
|                                        | NOR | 0.923                | 0.135   | 1.927         | 1.554 | 0.380 | 0.291      | 0.222         | 0.471 |
|                                        | LEV | 0.734                | 0.132   | 1.946         | 1.621 | 0.390 | 0.288      | 0.270         | 0.520 |
| PVDF                                   | SMX | 0.071                | 3.219   | 0.394         | 5.311 | 0.920 | 0.841      | 5.311         | 2.305 |
|                                        | TMP | 2.530                | 2.407   | 0.456         | 0.574 | 0.974 | 0.961      | 0.287         | 0.536 |
|                                        | NOR | 2.209                | 3.691   | 0.368         | 1.090 | 0.985 | 0.978      | 0.545         | 0.738 |
|                                        | LEV | 1.650                | 2.587   | 0.440         | 0.513 | 0.988 | 0.982      | 0.256         | 0.506 |

**Table S16.** Summary of the pseudo-first order (PFO) kinetic parameters and statistical error analysis from nonlinear regression.

|                                        |     | Pseudo-First Order (PFO) |                     |          |       |            |               |          |
|----------------------------------------|-----|--------------------------|---------------------|----------|-------|------------|---------------|----------|
|                                        |     | Nonlinear fitting        |                     |          |       |            |               |          |
|                                        |     | $k_1$                    | $q_e, \text{calc.}$ | SSE      | $R^2$ | Adj. $R^2$ | Red. $\chi^2$ | RMSE     |
| HF-Ti <sub>3</sub> C <sub>2</sub>      | SMX | 0.133                    | 0.010               | 4.10E-05 | 0.679 | 0.599      | 1.02E-05      | 3.20E-03 |
|                                        | TMP | 14.281                   | 0.056               | 4.61E-03 | 1.040 | 1.550      | 1.15E-03      | 3.40E-02 |
|                                        | NOR | 0.041                    | 0.142               | 8.26E-03 | 0.674 | 0.593      | 2.07E-03      | 4.54E-02 |
|                                        | LEV | 0.109                    | 0.063               | 8.00E-04 | 0.797 | 0.747      | 2.00E-04      | 1.41E-02 |
| HCl/HF-Ti <sub>3</sub> C <sub>2</sub>  | SMX | 0.042                    | 0.024               | 1.04E-04 | 0.847 | 0.808      | 2.60E-05      | 5.10E-03 |
|                                        | TMP | 0.039                    | 0.061               | 6.17E-04 | 0.830 | 0.787      | 1.54E-04      | 1.24E-02 |
|                                        | NOR | 0.006                    | 0.125               | 2.10E-03 | 0.710 | 0.637      | 5.24E-04      | 2.29E-02 |
|                                        | LEV | 0.065                    | 0.040               | 3.15E-04 | 0.815 | 0.769      | 7.89E-05      | 8.88E-03 |
| LiF/HCl-Ti <sub>3</sub> C <sub>2</sub> | SMX | 0.055                    | 0.022               | 6.17E-05 | 0.852 | 0.815      | 1.54E-05      | 3.93E-03 |
|                                        | TMP | 0.033                    | 0.156               | 1.36E-04 | 0.994 | 0.992      | 3.39E-05      | 5.82E-03 |
|                                        | NOR | 0.006                    | 0.527               | 1.15E-02 | 0.912 | 0.890      | 2.87E-03      | 5.36E-02 |
|                                        | LEV | 0.007                    | 0.339               | 1.95E-03 | 0.968 | 0.960      | 4.86E-04      | 2.21E-02 |
| PVDF                                   | SMX | 0.017                    | 0.001               | 4.27E-08 | 0.951 | 0.927      | 2.13E-08      | 1.46E-04 |
|                                        | TMP | 0.013                    | 0.076               | 7.31E-04 | 0.825 | 0.781      | 1.83E-04      | 1.35E-02 |
|                                        | NOR | 0.175                    | 0.107               | 3.93E-05 | 0.956 | 0.995      | 9.83E-06      | 3.14E-03 |
|                                        | LEV | 0.068                    | 0.027               | 6.82E-05 | 0.893 | 0.867      | 1.70E-05      | 4.13E-03 |

**Table S17.** Summary of the pseudo-second order (PSO) kinetic parameters and statistical error analysis from nonlinear regression.

|                                        |     | Pseudo-Second Order (PSO) |               |          |       |            |               |          |
|----------------------------------------|-----|---------------------------|---------------|----------|-------|------------|---------------|----------|
|                                        |     | Nonlinear fitting         |               |          |       |            |               |          |
|                                        |     | $k_2$                     | $q_{e,calc.}$ | SSE      | $R^2$ | Adj. $R^2$ | Red. $\chi^2$ | RMSE     |
| HF-Ti <sub>3</sub> C <sub>2</sub>      | SMX | 14.725                    | 0.011         | 3.70E-05 | 0.710 | 0.638      | 9.25E-06      | 3.04E-03 |
|                                        | TMP | 2.29E+22                  | 0.045         | 5.49E-04 | 0.757 | 0.696      | 1.37E-04      | 1.17E-02 |
|                                        | NOR | 0.205                     | 0.172         | 6.95E-03 | 0.726 | 0.657      | 1.74E-03      | 4.17E-02 |
|                                        | LEV | 2.392                     | 0.068         | 7.08E-04 | 0.821 | 0.776      | 1.77E-04      | 1.33E-02 |
| HCl/HF-Ti <sub>3</sub> C <sub>2</sub>  | SMX | 1.984                     | 0.026         | 1.43E-04 | 0.789 | 0.737      | 3.56E-05      | 5.97E-03 |
|                                        | TMP | 0.969                     | 0.065         | 6.97E-04 | 0.807 | 0.760      | 1.74E-04      | 1.32E-02 |
|                                        | NOR | 0.129                     | 0.112         | 1.87E-03 | 0.741 | 0.676      | 4.68E-04      | 2.16E-02 |
|                                        | LEV | 1.772                     | 0.044         | 3.16E-04 | 0.815 | 0.769      | 7.90E-05      | 8.89E-03 |
| LiF/HCl-Ti <sub>3</sub> C <sub>2</sub> | SMX | 4.158                     | 0.023         | 5.36E-05 | 0.872 | 0.840      | 1.34E-05      | 3.66E-03 |
|                                        | TMP | 0.236                     | 0.176         | 4.58E-04 | 0.979 | 0.973      | 1.15E-04      | 1.07E-02 |
|                                        | NOR | 0.008                     | 0.703         | 1.05E-02 | 0.920 | 0.899      | 2.63E-03      | 5.13E-02 |
|                                        | LEV | 0.011                     | 0.480         | 1.78E-03 | 0.971 | 0.964      | 4.46E-04      | 2.11E-02 |
| PVDF                                   | SMX | 7.981                     | 0.002         | 4.69E-08 | 0.947 | 0.920      | 2.35E-08      | 1.53E-04 |
|                                        | TMP | 0.214                     | 0.086         | 5.57E-04 | 0.867 | 0.833      | 1.39E-04      | 1.18E-02 |
|                                        | NOR | 3.898                     | 0.110         | 3.08E-05 | 0.997 | 0.996      | 7.69E-06      | 2.77E-03 |
|                                        | LEV | 3.321                     | 0.029         | 5.39E-05 | 0.916 | 0.895      | 1.35E-05      | 3.67E-03 |

**Table S18.** Comparison of the adsorption isotherm and kinetic parameters for the adsorption of antibiotics and dyes.

| Adsorbent Material                                                        | Adsorbate      | Adsorption Isotherm Parameters                                                                                                                                           | Adsorption Kinetic Parameters                                                                                                                                                                                                              | Removal Mechanisms                                                      | Reference |
|---------------------------------------------------------------------------|----------------|--------------------------------------------------------------------------------------------------------------------------------------------------------------------------|--------------------------------------------------------------------------------------------------------------------------------------------------------------------------------------------------------------------------------------------|-------------------------------------------------------------------------|-----------|
| LiF/HCl-Ti <sub>3</sub> C <sub>2</sub><br>(MXene-PVDF membrane composite) | Norfloxacin    | Freundlich: $K_F = 0.498$<br>(mg/g)/(mg/L) <sup>n</sup> ; $n = 1.707$ ; Adj. $R^2 = 0.869$<br><br>Langmuir: $Q_m = 3.43$ mg/g; $K_L = 0.126$ L/mg; Adj. $R^2 = 0.809$    | PFO: $q_e = 0.527$ mg/g; $k_1 = 0.006$ min <sup>-1</sup> ; Adj. $R^2 = 0.890$<br><br>PSO: $q_e = 0.703$ mg/g; $k_2 = 0.008$ g/mg-min; $R^2 = 0.899$<br><br>ID: $k_i = 0.025$ g/mg-min <sup>0.5</sup> ; $C = 2E-4$ mg/g; $R^2 = 0.951$      | Electrostatic interactions, hydrogen bonding, van der Waals interaction | This work |
| LiF/HCl-Ti <sub>3</sub> C <sub>2</sub><br>(nanosheets)                    | Norfloxacin    | Freundlich: $K_F = 126.12$<br>(mg/g)/(mg/L) <sup>n</sup> ; $n = 3.156$ ; Adj. $R^2 = 0.926$<br><br>Langmuir: $Q_m = 269.20$ mg/g; $K_L = 0.892$ L/mg; Adj. $R^2 = 0.962$ | n.d.                                                                                                                                                                                                                                       | Electrostatic interactions, hydrogen bonding, van der Waals interaction | This work |
| LiF/HCl-Ti <sub>3</sub> C <sub>2</sub><br>(nanosheets)                    | Trimethoprim   | Freundlich: $K_F = 7.377$<br>(mg/g)/(mg/L) <sup>n</sup> ; $n = 1.292$ ; Adj. $R^2 = 0.937$<br><br>Langmuir: $Q_m = 130.554$ mg/g; $K_L = 0.050$ L/mg; Adj. $R^2 = 0.936$ | n.d.                                                                                                                                                                                                                                       | Electrostatic interactions, hydrogen bonding, van der Waals interaction | This work |
| MXene                                                                     | Methylene Red  | n.d.                                                                                                                                                                     | PFO: $q_e = 61.5646$ mg/g; $k_1 = 0.1225$ min <sup>-1</sup> ; $R^2 = 0.7874$<br><br>PSO: $q_e = 69.2133$ mg/g; $k_2 = 0.0023$ g/mg-h; $R^2 = 0.8849$<br><br>ID: $k_i = 0.6.3752$ g/mg-h <sup>0.5</sup> ; $C = 15.293$ mg/g; $R^2 = 0.9497$ | Electrostatic interactions                                              | 3         |
| MXene                                                                     | Methylene Blue | Freundlich: $R^2 = 0.9969$<br>Langmuir: $R^2 = 0.9807$<br>(adsorption constant values not reported)                                                                      | PFO: $q_e = 8.09$ mg/g; $k_1 = 0.0068$ min <sup>-1</sup> ; $R^2 = 0.5053$                                                                                                                                                                  | Electrostatic interactions                                              | 4         |

|                                       |                |                                                                                                                                                                                                                 |                                                                                                                                                                                                                                                                   |                                                                                                   |   |
|---------------------------------------|----------------|-----------------------------------------------------------------------------------------------------------------------------------------------------------------------------------------------------------------|-------------------------------------------------------------------------------------------------------------------------------------------------------------------------------------------------------------------------------------------------------------------|---------------------------------------------------------------------------------------------------|---|
|                                       |                |                                                                                                                                                                                                                 | PSO: $q_e = 80.65 \text{ mg/g}$ ; $k_2 = 0.0069 \text{ g/mg-min}$ ; $R^2 = 0.9999$<br>ID: $k_i = 0.9926 \text{ g/mg-min}^{0.5}$ ; $C = 67.66 \text{ mg/g}$ ; $R^2 = 0.4455$                                                                                       |                                                                                                   |   |
| MXene                                 | Methylene Blue | Freundlich: $K_F = 48.152 \text{ (mg/g)/(mg/L)^n}$ ; $n = 19.963$ ; $R = 0.928$<br>Langmuir: $Q_m = 38.851 \text{ mg/g}$ ; $K_L = 1.743 \times 10^4 \text{ mL/mg}$ ; $R = 0.811$<br>(R = Pearson's coefficient) | n.d.                                                                                                                                                                                                                                                              | Electrostatic interactions                                                                        | 5 |
| MXene-NH <sub>3</sub>                 | Cr(VI)         | Freundlich: $K_F = 55.5 \text{ L/mg}$ ; $n = 6.37$ ; $R^2 = 0.929$<br>Langmuir: $q_m = 107.4 \text{ mg/g}$ ; $K_L = 1.416 \text{ L/g}$ ; $R^2 = 0.963$                                                          | PFO: $q_e = 0.97.0 \text{ mg/g}$ ; $k_1 = 0.02873 \text{ min}^{-1}$ ; $R^2 = 0.935$<br>PSO: $q_e = 93.6 \text{ mg/g}$ ; $k_2 = 0.00154 \text{ g/mg-min}$ ; $R^2 = 0.838$                                                                                          | Electrostatic interactions                                                                        | 6 |
| Graphene oxide (GO)                   | Norfloxacin    | Freundlich: $K_F = 89.007 \text{ (mg/g)/(mg/L)^n}$ ; $n = 2.703$ ; $R^2 = 0.962$<br>Langmuir: $Q_m = 334.610 \text{ mg/g}$ ; $K_L = 0.238 \text{ L/mg}$ ; $R^2 = 0.993$                                         | PFO: $q_e = 109.917 \text{ mg/g}$ ; $k_1 = 6.096 \text{ min}^{-1}$ ; $R^2 = 0.988$<br>PSO: $q_e = 120.589 \text{ mg/g}$ ; $k_2 = 0.299 \text{ g/mg-min}$ ; $R^2 = 0.999$<br>ID: $k_i = 0.9926 \text{ g/mg-min}^{0.5}$ ; $C = 67.66 \text{ mg/g}$ ; $R^2 = 0.4455$ | Van der Waals forces and $\pi$ - $\pi$ interaction, hydrogen bond donor and acceptor interactions | 7 |
| Multi-walled carbon nanotubes (MWCNT) | Norfloxacin    | Langmuir: $Q_m = 87.0 \text{ mg/g}$ ; $K_L = 0.276 \text{ L/mg}$ ; $R = 0.999$                                                                                                                                  | PSO: $k_2 = 2.55 \text{ g/mg-min}$ ; $R^2 > 0.99$                                                                                                                                                                                                                 | Hydrogen bonding, electrostatic interactions, hydrophobic effect, $\pi$ - $\pi$ interaction       | 8 |
| Polyvinyl chloride (microplastic)     | Sulfamethazine | Freundlich: $K_F = 46.6 \text{ L/kg}$ ; $n = 0.533$ ; $R^2 = 0.920$                                                                                                                                             | PFO: $q_e = 0.0657 \text{ mg/g}$ ; $k_1 = 0.032 \text{ min}^{-1}$ ; $R^2 = 0.981$                                                                                                                                                                                 | Electrostatic interactions, van der Waals interaction                                             | 9 |

|                                                       |                  |                                                                                                                                                                                                           |                                                                                                                                                                                                                                                     |                                                                                                            |    |
|-------------------------------------------------------|------------------|-----------------------------------------------------------------------------------------------------------------------------------------------------------------------------------------------------------|-----------------------------------------------------------------------------------------------------------------------------------------------------------------------------------------------------------------------------------------------------|------------------------------------------------------------------------------------------------------------|----|
|                                                       |                  | Langmuir: $q_m = 107.4 \text{ mg/g}$ ; $K_L = 1.416 \text{ L/g}$ ; $R^2 = 0.963$                                                                                                                          | PSO: $q_e = 0.0689 \text{ mg/g}$ ; $k_2 = 0.833 \text{ g/mg-min}$ ; $R^2 = 0.963$<br>ID: $k_i = 0.9926 \text{ g/mg-min}^{0.5}$ ; $C = 67.66 \text{ mg/g}$ ; $R^2 = 0.4455$                                                                          |                                                                                                            |    |
| Polyamide thin film composite nanofiltration membrane | Trimethoprim     | Freundlich: $K_F = 1.350 \text{ (ng/g)/(ng/L)}^n$ ; $n = 0.668$ ; $R^2 = 0.999$<br>Langmuir: $Q_m = 6.313 \text{ ng/cm}^2$ ; $K_L = 0.319 \text{ L/ng}$ ; $R^2 = 0.955$<br>Area = $80 \text{ cm}^2$       | n.d.                                                                                                                                                                                                                                                | Electrostatic interactions, hydrophobic                                                                    | 10 |
| Polyamide thin film composite nanofiltration Membrane | Sulfamethoxazole | Freundlich: $K_F = 0.114 \text{ (ng/g)/(mg/L)}^n$ ; $n = 0.224$ ; $R^2 = 0.562$<br>Area = $80 \text{ cm}^2$                                                                                               | n.d.                                                                                                                                                                                                                                                | Electrostatic interaction, hydrophobic                                                                     | 10 |
| Zeolite                                               | Levofloxacin     | Freundlich: $K_F = 2.22\text{-}23. \text{ (mg/g)/(L/g)}^n$ ; $n = 1.7\text{-}3.3$ ; $R^2 > 0.9041$<br>Langmuir: $Q_m = 16\text{-}45 \text{ mg/g}$ ; $K_L = 0.10\text{-}1.3 \text{ L/mg}$ ; $R^2 > 0.9826$ | n.d.                                                                                                                                                                                                                                                |                                                                                                            | 11 |
| Attapulgit-biochar                                    | Norfloxacin      | Freundlich: $K_F = 1.58 \text{ (mg/g)/(L/g)}^n$ ; $n = 0.48$ ; $R^2 = 0.86$<br>Langmuir: $Q_m = 5.02 \text{ mg/g}$ ; $K_L = 0.45 \text{ L/mg}$ ; $R^2 = 0.93$                                             | PFO: $q_e = 0.81 \text{ mg/g}$ ; $k_1 = 2.65 \text{ min}^{-1}$ ; $R^2 = 0.74$<br>PSO: $q_e = 1.98 \text{ mg/g}$ ; $k_2 = 0.04 \text{ g/mg-min}$ ; $R^2 = 0.99$<br>ID: $k_i = 0.009 \text{ g/mg-min}^{0.5}$ ; $C = 1.61 \text{ mg/g}$ ; $R^2 = 0.89$ | Hydrophobic interactions, $\pi$ - $\pi$ electron-donor-acceptor (EDA) interaction, hydrogen bond formation | 12 |

## Density Functional Theory Calculations

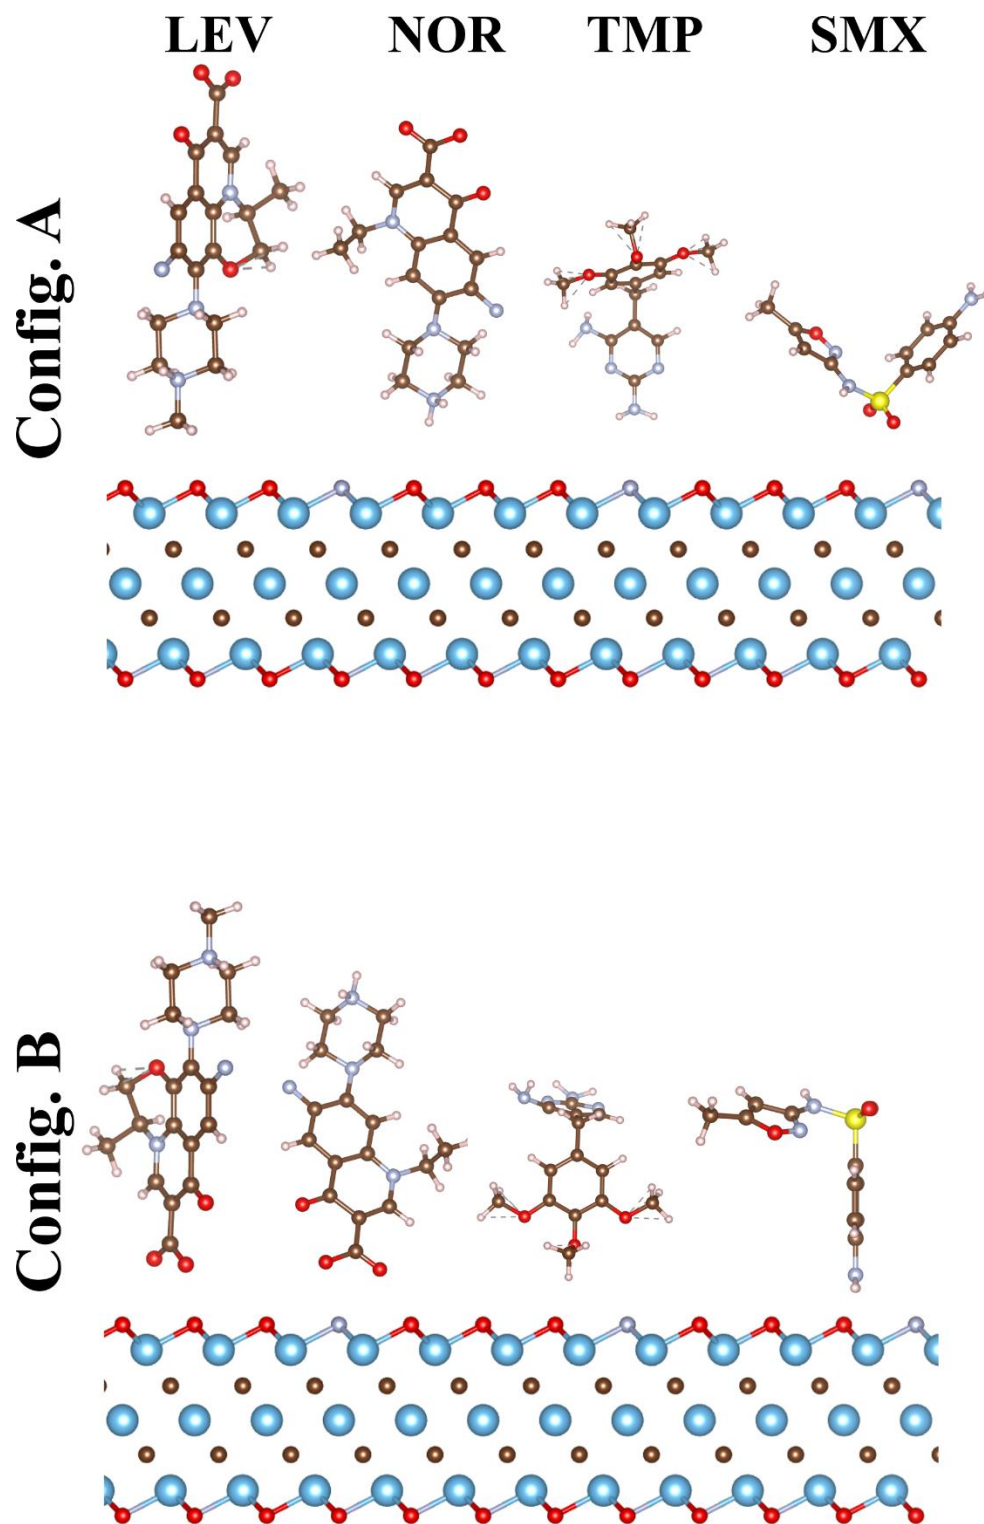

**Figure S6.** Schematics of antibiotics approaching the MXene surface (positioned 2Å above the surface terminations). Antibiotics are in speciation form present at neutral pH.

## References

- (1) *Geometrical Descriptors Plugin Chemaxon Docs*. <https://docs.chemaxon.com/display/docs/geometrical-descriptors-plugin.md> (accessed 2023-09-28).
- (2) *Help Online - Origin Help - Theory of Nonlinear Curve Fitting*. <https://www.originlab.com/doc/en/Origin-help/NLFit-theory> (accessed 2023-11-26).
- (3) Lim, S.; Kim, J. H.; Park, H.; Kwak, C.; Yang, J.; Kim, J.; Ryu, S. Y.; Lee, J. Role of Electrostatic Interactions in the Adsorption of Dye Molecules by Ti3C2-MXenes. *RSC Adv.* **2021**, *11* (11), 6201–6211. <https://doi.org/10.1039/D0RA10876F>.
- (4) Jun, B.-M.; Heo, J.; Taheri-Qazvini, N.; Park, C. M.; Yoon, Y. Adsorption of Selected Dyes on Ti3C2Tx MXene and Al-Based Metal-Organic Framework. *Ceramics International* **2020**, *46* (3), 2960–2968. <https://doi.org/10.1016/j.ceramint.2019.09.293>.
- (5) Mashtalir, O.; Cook, K. M.; Mochalin, V. N.; Crowe, M.; Barsoum, M. W.; Gogotsi, Y. Dye Adsorption and Decomposition on Two-Dimensional Titanium Carbide in Aqueous Media. *J. Mater. Chem. A* **2014**, *2* (35), 14334–14338. <https://doi.org/10.1039/C4TA02638A>.
- (6) Kong, A.; Sun, Y.; Peng, M.; Gu, H.; Fu, Y.; Zhang, J.; Li, W. Amino-Functionalized MXenes for Efficient Removal of Cr(VI). *Colloids and Surfaces A: Physicochemical and Engineering Aspects* **2021**, *617*, 126388. <https://doi.org/10.1016/j.colsurfa.2021.126388>.
- (7) Moreira, V. R.; Lebron, Y. A. R.; da Silva, M. M.; de Souza Santos, L. V.; Jacob, R. S.; de Vasconcelos, C. K. B.; Viana, M. M. Graphene Oxide in the Remediation of Norfloxacin from Aqueous Matrix: Simultaneous Adsorption and Degradation Process. *Environ Sci Pollut Res* **2020**, *27* (27), 34513–34528. <https://doi.org/10.1007/s11356-020-09656-6>.
- (8) Yang, W.; Lu, Y.; Zheng, F.; Xue, X.; Li, N.; Liu, D. Adsorption Behavior and Mechanisms of Norfloxacin onto Porous Resins and Carbon Nanotube. *Chemical Engineering Journal* **2012**, *179*, 112–118. <https://doi.org/10.1016/j.cej.2011.10.068>.
- (9) Guo, X.; Liu, Y.; Wang, J. Sorption of Sulfamethazine onto Different Types of Microplastics: A Combined Experimental and Molecular Dynamics Simulation Study. *Marine Pollution Bulletin* **2019**, *145*, 547–554. <https://doi.org/10.1016/j.marpolbul.2019.06.063>.
- (10) Liu, Y.; Wang, X.; Yang, H.; Xie, Y. F. Adsorption of Pharmaceuticals onto Isolated Polyamide Active Layer of NF/RO Membranes. *Chemosphere* **2018**, *200*, 36–47. <https://doi.org/10.1016/j.chemosphere.2018.02.088>.
- (11) Martucci, A.; Pasti, L.; Marchetti, N.; Cavazzini, A.; Dondi, F.; Alberti, A. Adsorption of Pharmaceuticals from Aqueous Solutions on Synthetic Zeolites. *Microporous and Mesoporous Materials* **2012**, *148* (1), 174–183. <https://doi.org/10.1016/j.micromeso.2011.07.009>.
- (12) Li, Y.; Wang, Z.; Xie, X.; Zhu, J.; Li, R.; Qin, T. Removal of Norfloxacin from Aqueous Solution by Clay-Biochar Composite Prepared from Potato Stem and Natural Attapulgite. *Colloids and Surfaces A: Physicochemical and Engineering Aspects* **2017**, *514*, 126–136. <https://doi.org/10.1016/j.colsurfa.2016.11.064>.
